# Supplementary material
Source: PubMed Central journal article supplement (PMC3548306)

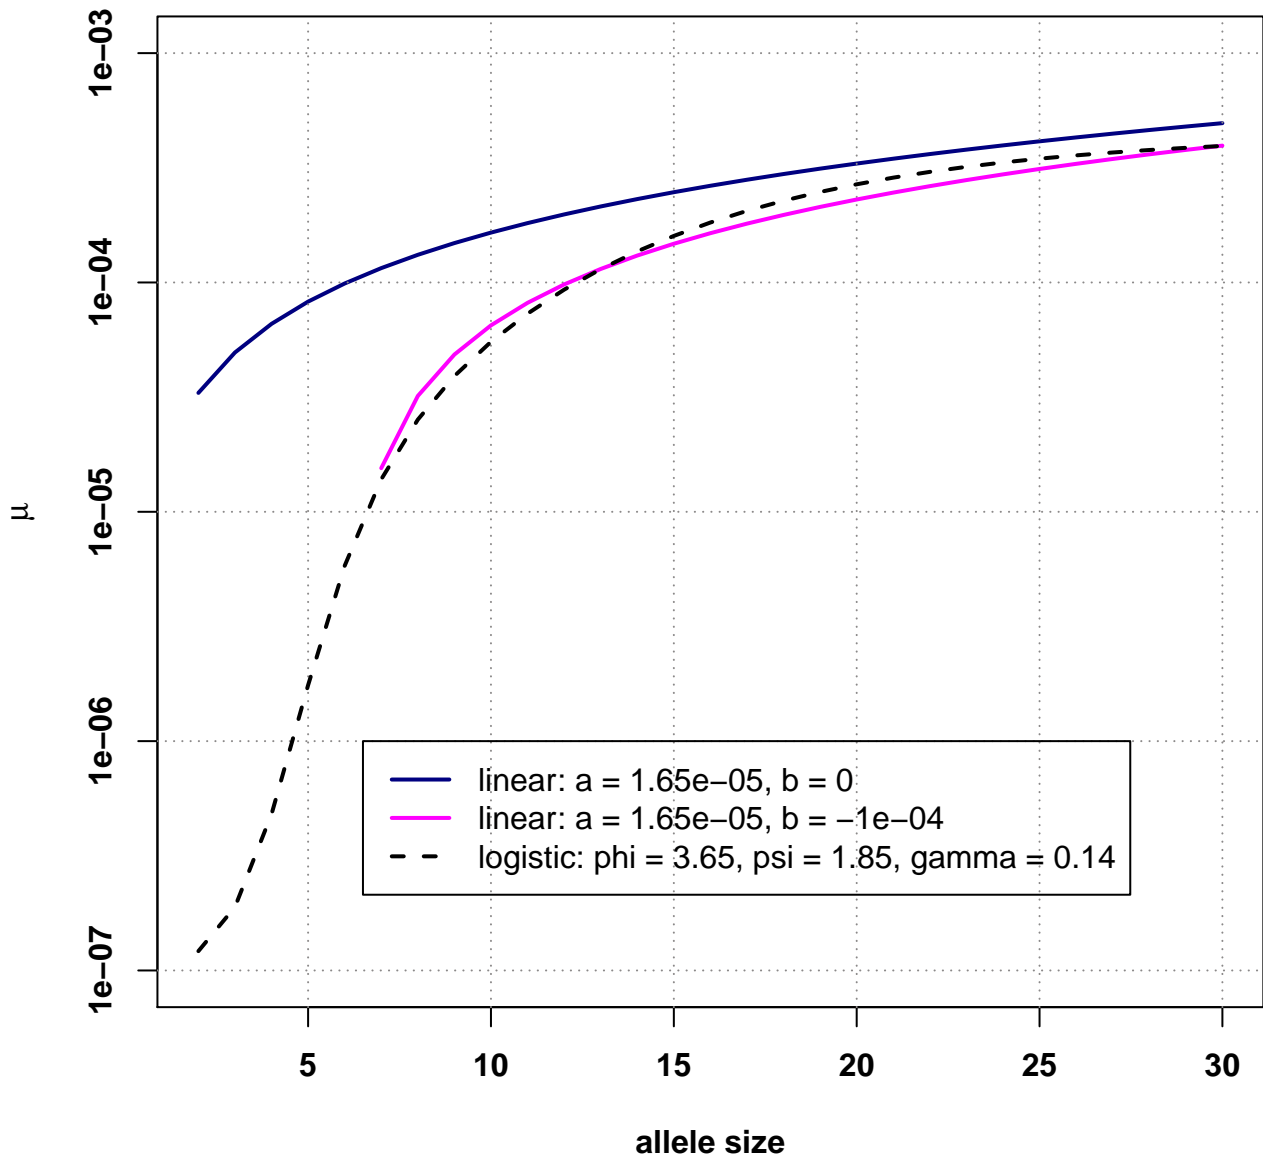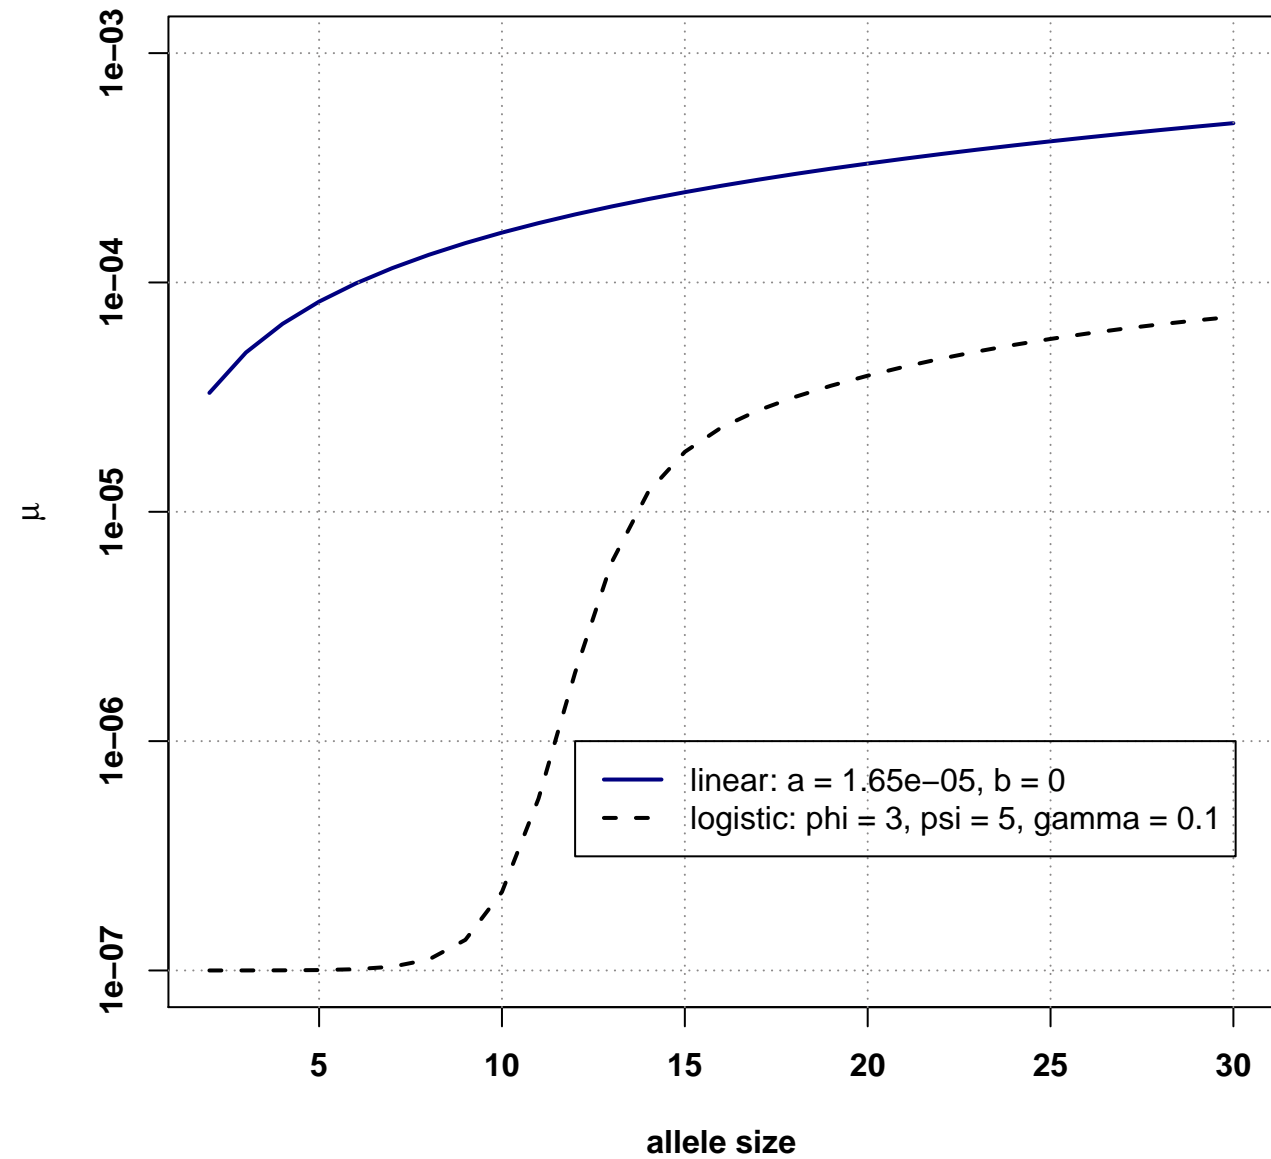

Supplement: supp_mss247_FIGUREsup1.pdf [file supp_mss247_FIGUREsup1.pdf]

# Relative Density

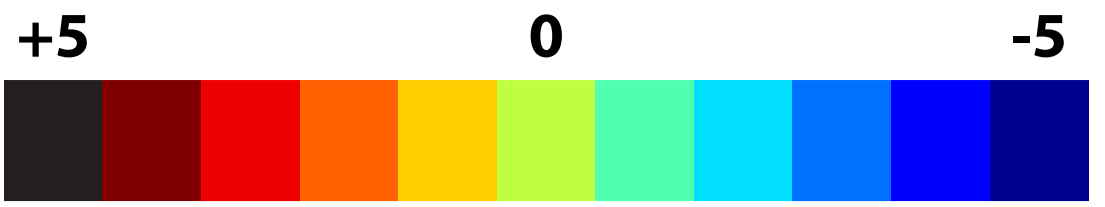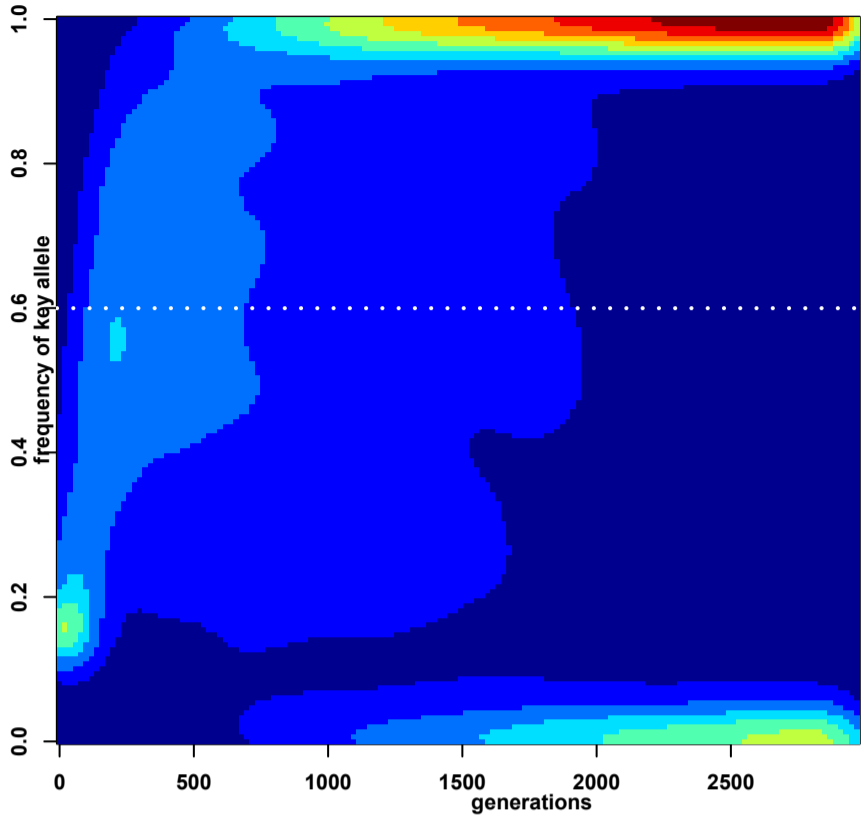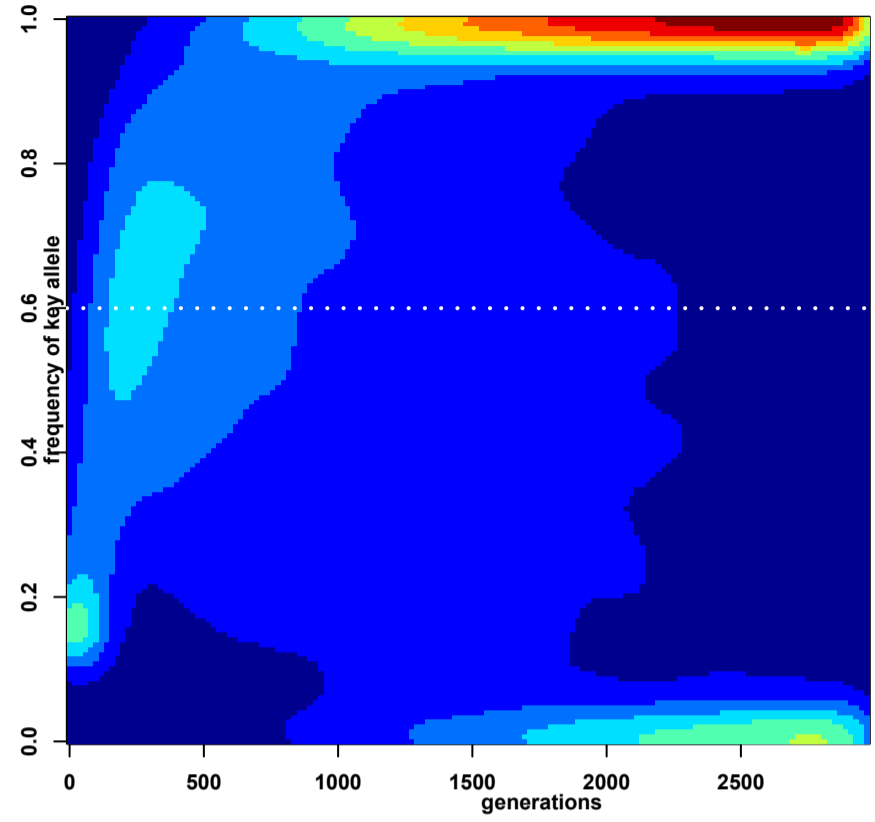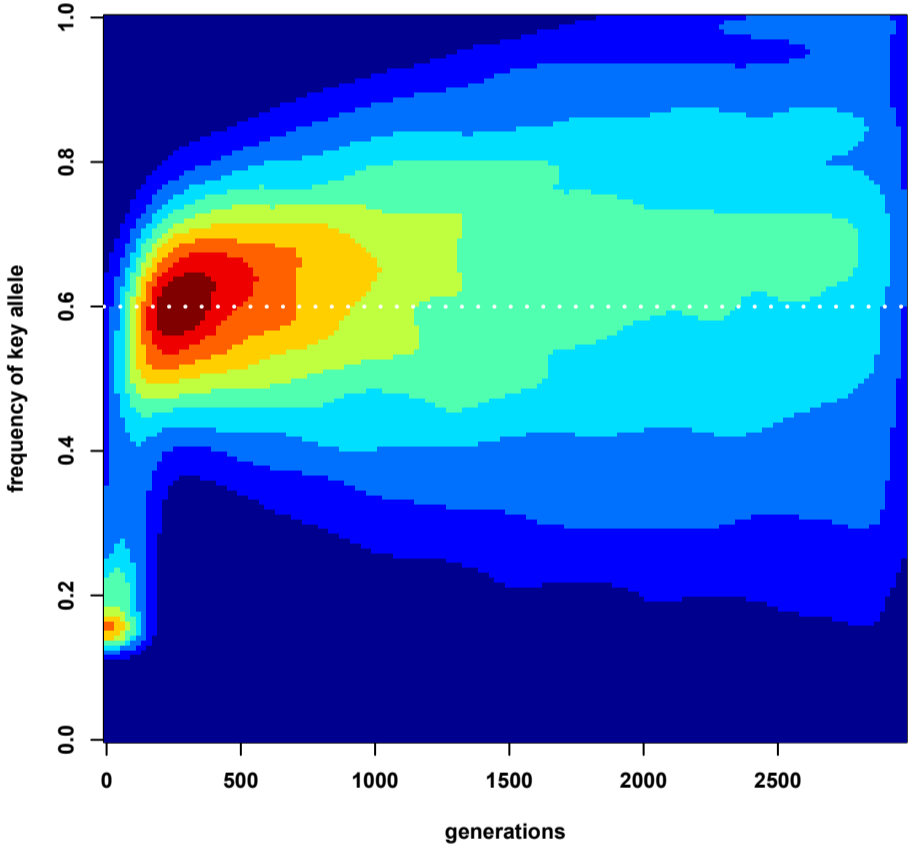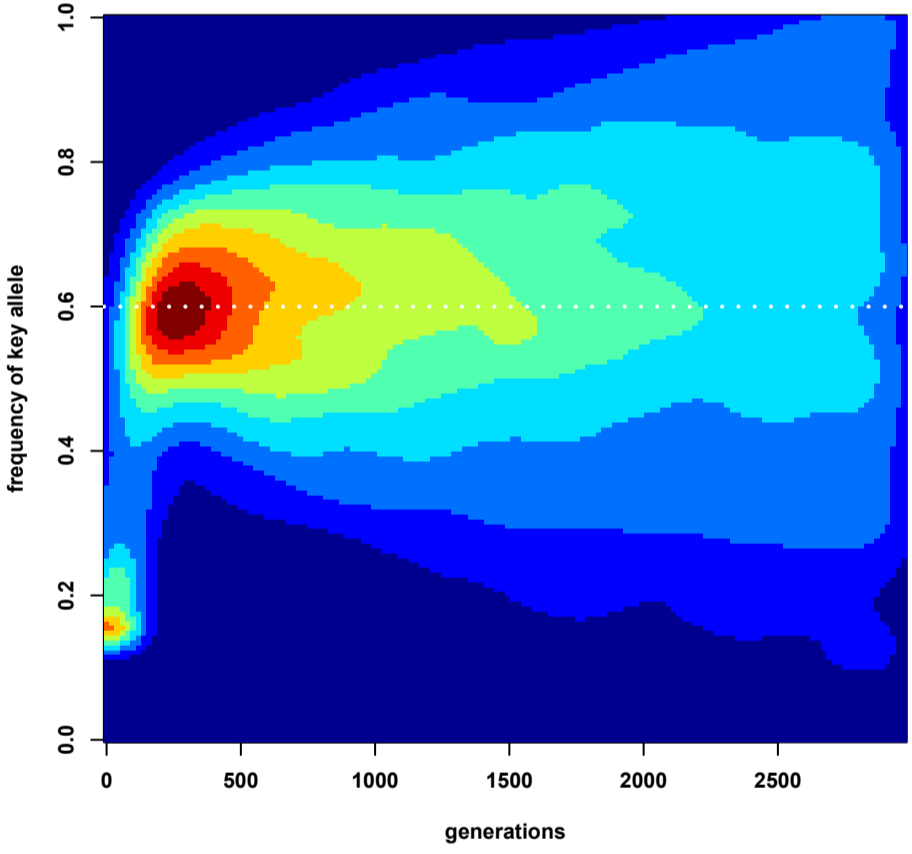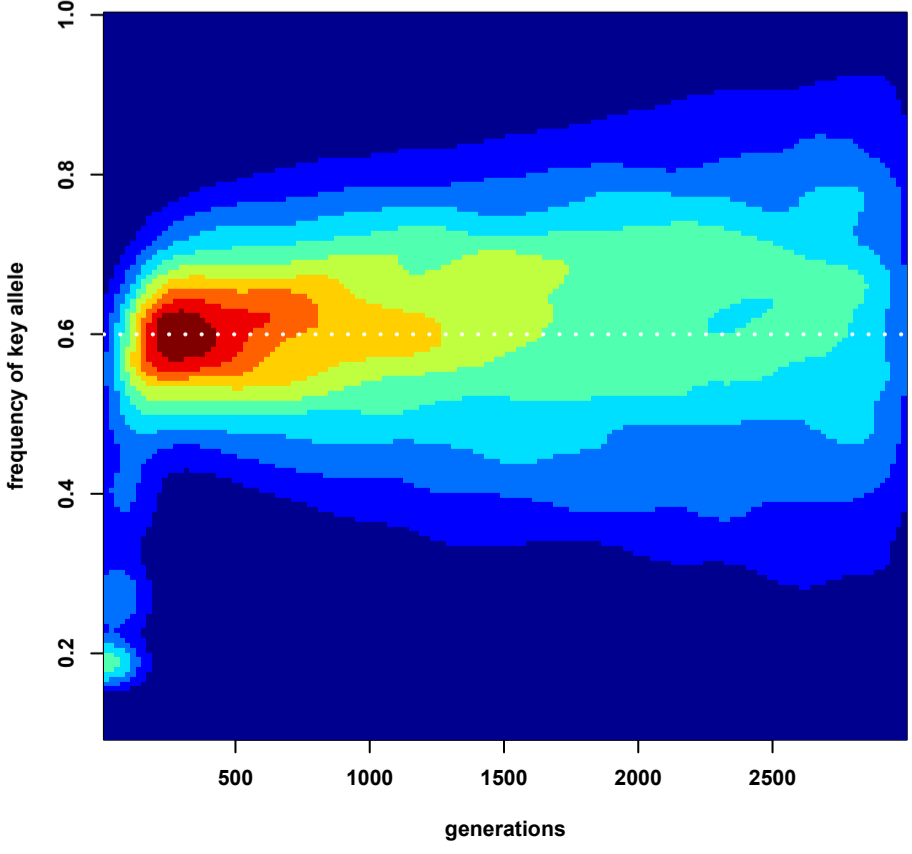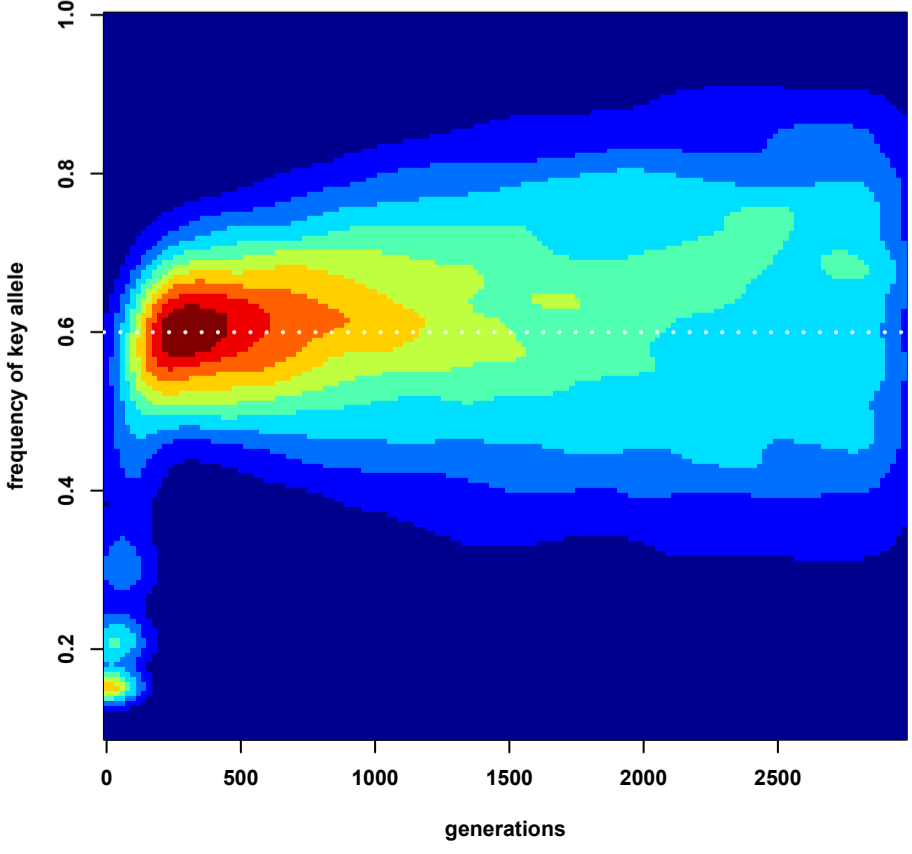

Supplement: supp_mss247_FIGUREsup2.pdf [file supp_mss247_FIGUREsup2.pdf]

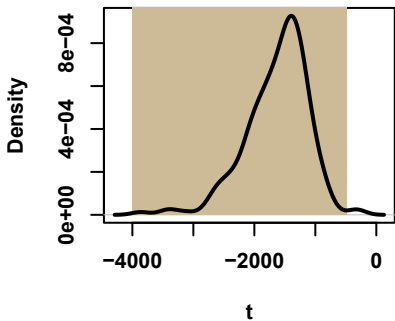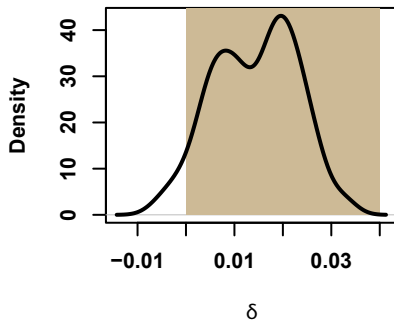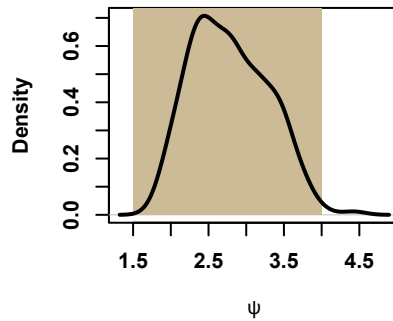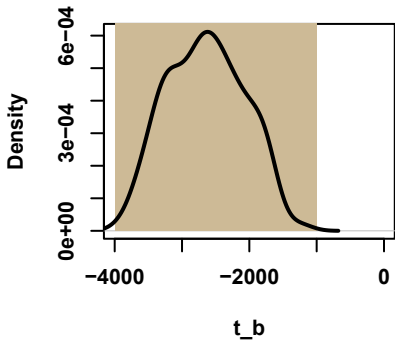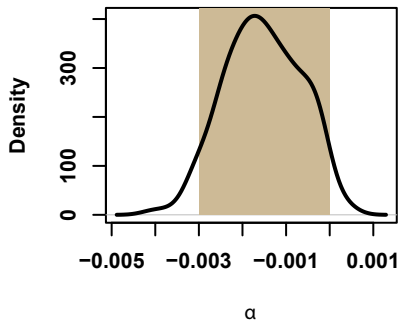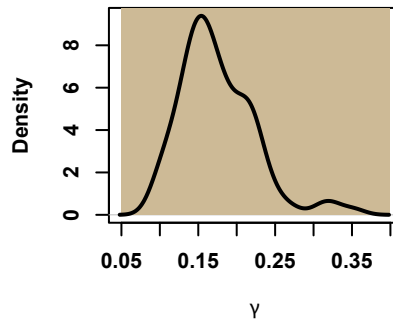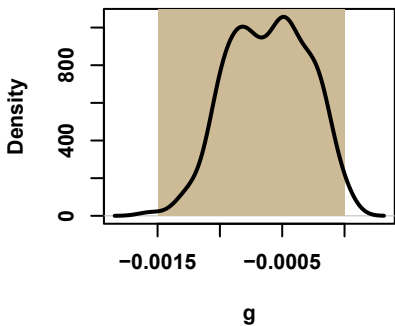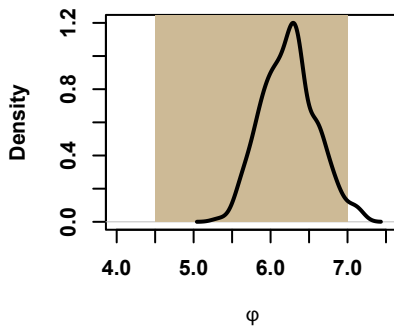

Supplement: supp_mss247_FIGUREsup3.pdf [file supp_mss247_FIGUREsup3.pdf]

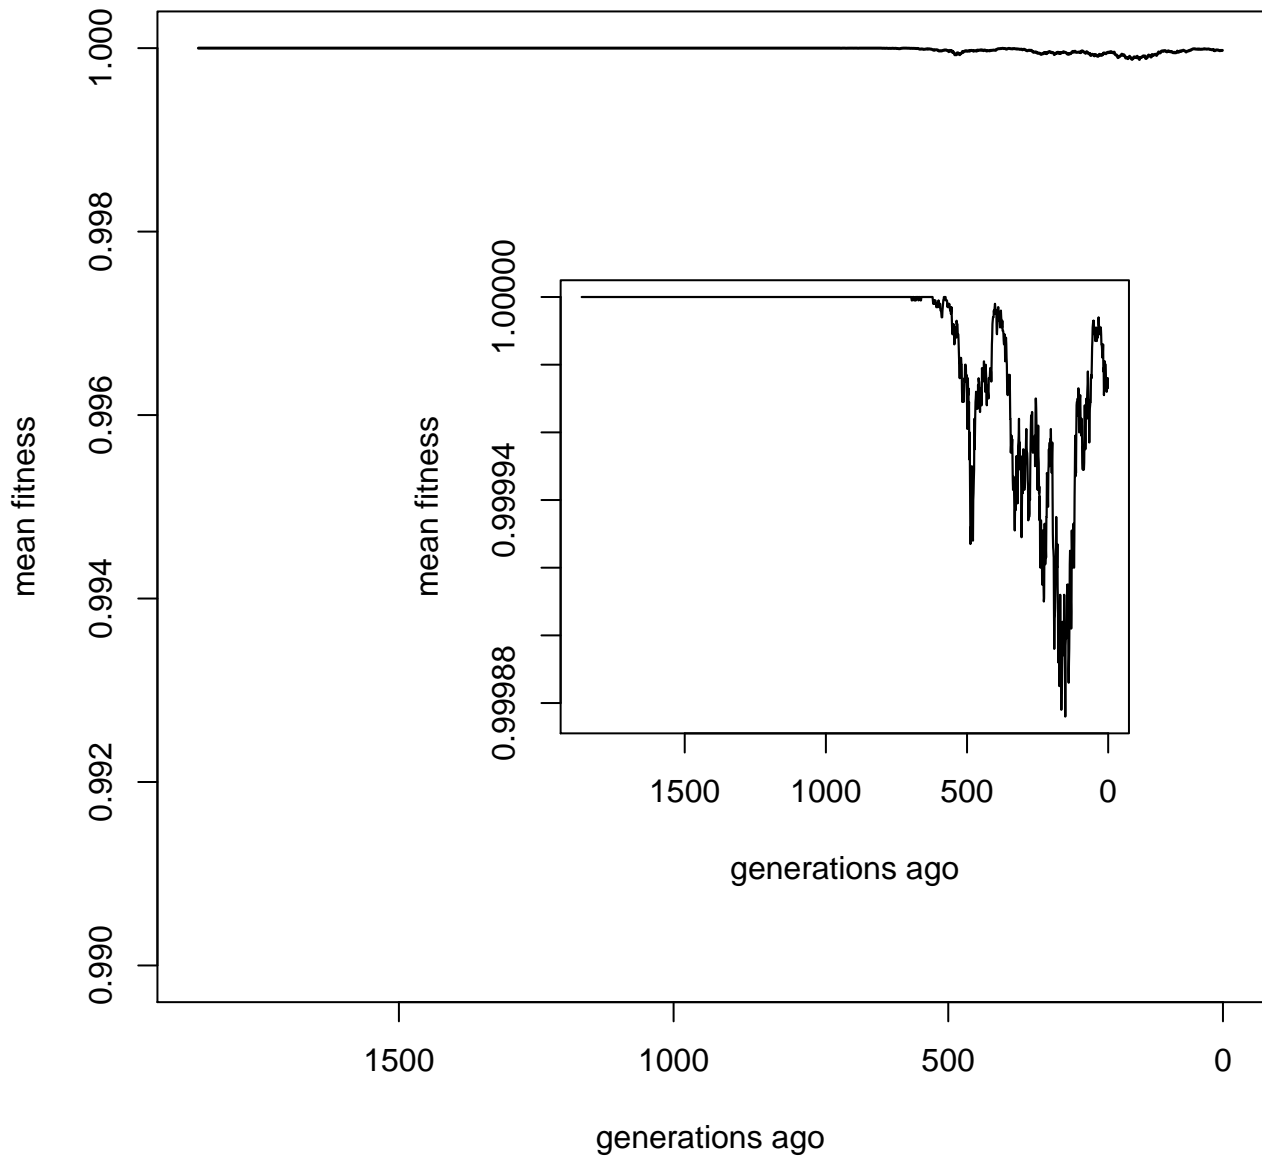

Supplement: supp_mss247_FIGUREsup4.pdf [file supp_mss247_FIGUREsup4.pdf]
